# Supplementary material
Source: HighWire-hosted journal article supplement (https://fg.bmj.com/content/flgastro-2018-100970)
Supplement: inline-supplementary-material-1 [file inline-supplementary-material-1.pdf]

## Appendix 1

### Part 1:

|                                     |                         |               |
|-------------------------------------|-------------------------|---------------|
| Organisation                        | Pre populated read only |               |
| Number of sites in the organisation | Dropdown box 1-50       |               |
| Site                                | Pre populated read only |               |
| JAG Registration Number             | Pre populated read only |               |
| Name of Lead Consultant             | Name                    | Email address |
| Name of Lead Nurse                  | Name                    | Email address |
| Name of Service Lead                | Name                    | Email address |
| Name of Chief Executive             | Name                    | Email address |

|                                             |                                      |
|---------------------------------------------|--------------------------------------|
| Catchment population served by site         | Drop-down in 50,000 increments + n/a |
| Catchment population served by organisation | Drop-down in 50,000 increments + n/a |
| Is this a linked site return?               |                                      |
| If yes please provide names of linked sites |                                      |

|                                                                         |                                                                                                                                                                                                                                                                                                                                                                                                     |
|-------------------------------------------------------------------------|-----------------------------------------------------------------------------------------------------------------------------------------------------------------------------------------------------------------------------------------------------------------------------------------------------------------------------------------------------------------------------------------------------|
| What type of endoscopy service/facility do you operate from?            | Drop down box. options;<br><ol style="list-style-type: none"> <li>1. Standalone dedicated single facility</li> <li>2. Part of a multisite endoscopy service</li> <li>3. Integrated with a day surgery facility</li> <li>4. Independent treatment centre</li> <li>5. Lists done within operating theatres and recovery either in rooms or shared facilities</li> <li>6. None of the above</li> </ol> |
| Number of procedure rooms at your site                                  | Drop down box 1-15                                                                                                                                                                                                                                                                                                                                                                                  |
| Do you lease or use any additional endoscopy rooms away from your site? | Yes/No                                                                                                                                                                                                                                                                                                                                                                                              |
| Number of staffed GI sessions per week for this site                    | Whole numbers up to 250                                                                                                                                                                                                                                                                                                                                                                             |
| Number of scheduled GI sessions pw for this site                        | Whole numbers up to 250                                                                                                                                                                                                                                                                                                                                                                             |
| Number of dedicated training lists pw for this site                     | Whole numbers up to 100                                                                                                                                                                                                                                                                                                                                                                             |

|                                                                       |                                                                                                                                                                                                                                                              |
|-----------------------------------------------------------------------|--------------------------------------------------------------------------------------------------------------------------------------------------------------------------------------------------------------------------------------------------------------|
| Which Endoscopy Reporting System is currently in use in your service? | Options to select from inc. "none", and final "Other (please specify)" to allow free text<br><br>None<br>Aquilant<br>Ascribe (EMIS)<br>Endoscopy Management System (EMS) by Medilogik<br>Endosoft Inflex (CIMS) Olympus<br>Unisoft<br>Other (please specify) |
|-----------------------------------------------------------------------|--------------------------------------------------------------------------------------------------------------------------------------------------------------------------------------------------------------------------------------------------------------|

Safety

|                                                                                     |                                         |
|-------------------------------------------------------------------------------------|-----------------------------------------|
| Is your endoscopy safety checklist completion routinely electronic or paper based * | Electronic/Paper-based/we don't use one |
| Do you audit the use of the endoscopy safety checklist? *                           | Yes/No                                  |

Use of endoscopy department to support patient flow

|                                                                                                                                                                                                                                     |                                         |
|-------------------------------------------------------------------------------------------------------------------------------------------------------------------------------------------------------------------------------------|-----------------------------------------|
| In the last 12 months have you had to use any area within the endoscopy department to support flow in the emergency department? For example, as a temporary escalation area for patients pending discharge home or awaiting a bed * | Yes/No/We do not have an emergency dept |
| If yes, on approximately how many occasions has this happened? *                                                                                                                                                                    | Number up to 500 or n/a                 |
| If yes, how many of these occasions were in response to a major internal or external trust incident? *                                                                                                                              | Number up to 500 or n/a                 |

## Part 2: Waiting Times

|                                                                                                                                                                                                                                                 |                                                                                                                                                                                                                                                                                                                                                                           |
|-------------------------------------------------------------------------------------------------------------------------------------------------------------------------------------------------------------------------------------------------|---------------------------------------------------------------------------------------------------------------------------------------------------------------------------------------------------------------------------------------------------------------------------------------------------------------------------------------------------------------------------|
| <p>On a scale of 1-10, please indicate how difficult it has been during 2016 to deliver sufficient capacity to meet the demand for endoscopy.</p>                                                                                               | <p>1-10 scale (where 1 – no problem and 10 – very difficult)</p>                                                                                                                                                                                                                                                                                                          |
| <p>During the last three months, have you failed to meet the relevant national waiting times targets for the following categories?</p> <p>Urgent cancer waits</p> <p>Non-cancer urgent waits</p> <p>Routine waits</p> <p>Surveillance waits</p> | <p>Yes – failed to meet target/no – met target/not applicable</p> <p>Yes – failed to meet target/no – met target/not applicable</p> <p>Yes – failed to meet target/no – met target/not applicable</p> <p>Yes – failed to meet target/no – met target/not applicable</p>                                                                                                   |
| <p>What clinical presentations do you define in the 'urgent non-cancer' category? (For example, acute colitis.)</p>                                                                                                                             | <p>Add/delete multiple free text items</p>                                                                                                                                                                                                                                                                                                                                |
| <p>Where you have had constraints to meeting waiting times, which of the following have applied</p>                                                                                                                                             | <p>Endoscopist capacity</p> <p>Endoscopist recruitment</p> <p>Endoscopist job planning</p> <p>Nursing capacity</p> <p>Nursing recruitment</p> <p>Nursing job planning</p> <p>Admin capacity</p> <p>Admin recruitment</p> <p>Physical capacity</p> <p>Unplanned demand</p> <p>Lack of business plan</p> <p>Business plan not approved</p> <p>Other (free text option):</p> |

### Waiting list initiatives

During 2016 have you performed any of the following using your own workforce to increase capacity and maintain waiting times?

|                                                     |                                                              |
|-----------------------------------------------------|--------------------------------------------------------------|
| Ad hoc weekend work                                 | Yes - every week/Yes - most weeks/Yes - less frequently/No   |
| Ad hoc evening work/ad hoc three-session days       | Yes - every week/ Yes - most weeks/ Yes - less frequently/No |
| Backfilling of vacant lists during the working week | Yes - every week/ Yes - most weeks/ Yes - less frequently/No |

### Extended hours as part of the normal working week

During 2016 has your service introduced any of the following patterns of extended hours as part of the normal working week in order to increase capacity and maintain waiting times? For example a contractual requirement to work extended hours during the weekend and evenings.

|                                                                                                                                                                                                                                                                                                                                         |                                                                                                                                                                                                                                                                                                                                                                                                                                                                                                                                                                                                                                                                                                                               |
|-----------------------------------------------------------------------------------------------------------------------------------------------------------------------------------------------------------------------------------------------------------------------------------------------------------------------------------------|-------------------------------------------------------------------------------------------------------------------------------------------------------------------------------------------------------------------------------------------------------------------------------------------------------------------------------------------------------------------------------------------------------------------------------------------------------------------------------------------------------------------------------------------------------------------------------------------------------------------------------------------------------------------------------------------------------------------------------|
| <p>Six-day working (eg Saturday)</p> <p>Seven-day working</p> <p>Evening work/three-session days</p> <p>Additional sessions during the working week, if you were not already doing two sessions each day on five days</p><br><p>If you have been unable to introduce any of these, please indicate what your constraints have been:</p> | <p>Yes – every week/Yes – most weeks/Yes – less frequently/No</p> <p>Yes – every week/Yes – most weeks/Yes – less frequently/No</p> <p>Yes – every week/Yes – most weeks/Yes – less frequently/No</p> <p>Yes – every week/Yes – most weeks/Yes – less frequently/No</p><br><p>Extended working hours not required to meet waiting times targets</p> <p>Endoscopist capacity</p> <p>Endoscopist recruitment</p> <p>Endoscopist job planning</p> <p>Nursing capacity</p> <p>Nursing recruitment</p> <p>Nursing job planning</p> <p>Admin capacity</p> <p>Admin recruitment</p> <p>Physical capacity</p> <p>Unplanned demand</p> <p>Lack of business plan</p> <p>Business plan not approved</p> <p>Other (free text option):</p> |
|-----------------------------------------------------------------------------------------------------------------------------------------------------------------------------------------------------------------------------------------------------------------------------------------------------------------------------------------|-------------------------------------------------------------------------------------------------------------------------------------------------------------------------------------------------------------------------------------------------------------------------------------------------------------------------------------------------------------------------------------------------------------------------------------------------------------------------------------------------------------------------------------------------------------------------------------------------------------------------------------------------------------------------------------------------------------------------------|

## Outsourcing

|                                                                                                                                                                                                                                                                                                                                                                                        |                                                                                           |
|----------------------------------------------------------------------------------------------------------------------------------------------------------------------------------------------------------------------------------------------------------------------------------------------------------------------------------------------------------------------------------------|-------------------------------------------------------------------------------------------|
| <p>During 2016, have you 'outsourced' any activity to an external provider?</p> <p><u>If Yes</u>, is this –<br/>         A service level agreement for regular activity?<br/>         A contract to reduce long waits?<br/>         An ad-hoc arrangement?</p> <p><u>If yes</u>, approximately what percentage of your activity in 2016 was outsourced + option for 'unsure' +2015</p> | <p>Yes/No</p> <p>Yes/No<br/>         Yes/No<br/>         Yes/No</p> <p>&lt;1% to 100%</p> |
| <p>Please provide the name(s) of the external service(s) used:<br/>         Function to add names of any external services used – main provider based on numbers of procedures, followed by option for multiple 'others'</p>                                                                                                                                                           |                                                                                           |

## Insourcing

|                                                                                                                                                                                                                                                                                                                                                                                                                                                                                                   |                                                                                           |
|---------------------------------------------------------------------------------------------------------------------------------------------------------------------------------------------------------------------------------------------------------------------------------------------------------------------------------------------------------------------------------------------------------------------------------------------------------------------------------------------------|-------------------------------------------------------------------------------------------|
| <p>During 2016, have you commissioned a complete external provider team to provide additional procedures in your own facilities ('insourcing')?</p> <p><u>If Yes</u>, is this –<br/>         A service level agreement for regular activity?<br/>         A contract to reduce long waits?<br/>         An ad-hoc arrangement?</p> <p><u>If yes</u>, approximately what percentage of your activity by procedure numbers in 2016 was performed by an insourced provider + option for 'unsure'</p> | <p>Yes/No</p> <p>Yes/No<br/>         Yes/No<br/>         Yes/No</p> <p>&lt;1% to 100%</p> |
|---------------------------------------------------------------------------------------------------------------------------------------------------------------------------------------------------------------------------------------------------------------------------------------------------------------------------------------------------------------------------------------------------------------------------------------------------------------------------------------------------|-------------------------------------------------------------------------------------------|

|                                                                                                                                                                                                                        |               |
|------------------------------------------------------------------------------------------------------------------------------------------------------------------------------------------------------------------------|---------------|
| <p>Please provide the name(s) of the external service(s) used:</p> <p>Function to add names of any external services used – main provider based on numbers of procedures, followed by option for multiple ‘others’</p> |               |
| <p>During 2016, have you commissioned external endoscopists only to provide additional procedures in your own facilities supported by your own nursing team?</p>                                                       | <p>Yes/No</p> |

|                                                                                                                                                                   |                                                                                                                                                                                          |
|-------------------------------------------------------------------------------------------------------------------------------------------------------------------|------------------------------------------------------------------------------------------------------------------------------------------------------------------------------------------|
| <p>Does the service have an agreed capacity plan to meet demand?</p>                                                                                              | <p>No/Yes – plan for 1yr/ Yes – plan for 3yrs/ Yes – plan for 5yrs/ Yes – plan for 10yrs</p>                                                                                             |
| <p>Do you have systems in place for the routine collection of data for:</p> <p>Demand &amp; Capacity</p> <p>Utilisation of lists</p> <p>Utilisation of points</p> | <p>Yes – per service/Yes – per individual endoscopist/No</p> <p>Yes – per service/Yes – per individual endoscopist /No</p> <p>Yes – per service/Yes – per individual endoscopist /No</p> |
| <p>I feel optimistic about my service’s ability to fulfill timeliness requirements over the next 12 months</p>                                                    | <p>1-10 scale (where 1 – very pessimistic and 10 very optimistic)</p>                                                                                                                    |
| <p>Please explain why you are feeling optimistic or pessimistic about your service’s ability to fulfil the timeliness requirements.</p>                           | <p>Free text</p>                                                                                                                                                                         |

#### DNA rates

In the UK, DNA is an abbreviation for a patient who "did not attend" on the day of their appointment and did not notify the service.

|                                                                        |                              |                                                                 |
|------------------------------------------------------------------------|------------------------------|-----------------------------------------------------------------|
| <p>During 2016 what was your DNA rate for GI endoscopy procedures?</p> | <p><i>Standard lists</i></p> | <p>Percentage up to 2 decimal places, capped at 20% maximum</p> |
|                                                                        | <p><i>BCSP</i></p>           | <p>Percentage up to 2 decimal places, capped at 20% maximum</p> |

## List Length

|                                                                   |                            |
|-------------------------------------------------------------------|----------------------------|
| What number of points are typically performed on a service list?  | Numerical only 1-50        |
| What number of points are typically performed on a training list? | Numerical only 1-50 or n/a |

### Part 3: Activity performed at your endoscopy site

Please note that these numbers should relate to the numbers of procedures conducted at your endoscopy site, and not the whole Trust/Organisation. If your data represent a linked multi-site service, please make sure that you give us details of the sites covered in the final comments field at the end of this survey.

|                                                                                         |                                                                                 |                      |                      |                      |
|-----------------------------------------------------------------------------------------|---------------------------------------------------------------------------------|----------------------|----------------------|----------------------|
| Please provide numbers to record your endoscopy activity for the calendar year of 2016. | 2015                                                                            |                      | 2016                 |                      |
| Upper GI (including therapeutic procedures)                                             | All numerical values<br>2015 values carried forward from last year's submission |                      | All numerical values |                      |
|                                                                                         | <i>Standard</i>                                                                 | <i>BCSP</i>          | <i>Standard</i>      | <i>BCSP</i>          |
| Colonoscopy                                                                             | All numerical values                                                            | All numerical values | All numerical values | All numerical values |
| Flexible sigmoidoscopy                                                                  | All numerical values                                                            | All numerical values | All numerical values | All numerical values |
| Balloon enteroscopy (single or capsule endoscopy)                                       | All numerical values                                                            |                      | All numerical values |                      |
| Enteroscopy                                                                             | All numerical values                                                            |                      | All numerical values |                      |
| ERCP                                                                                    | All numerical values                                                            |                      | All numerical values |                      |
| EUS (total numbers)                                                                     | All numerical values                                                            |                      | All numerical values |                      |
| EUS – rectal (if known)                                                                 | All numerical values                                                            |                      | All numerical values |                      |
| EUS – Upper GI (if known)                                                               | All numerical values                                                            |                      | All numerical values |                      |
| EUS – HPB (if known)                                                                    | All numerical values                                                            |                      | All numerical values |                      |
| Total number of GI procedures                                                           | All numerical values                                                            |                      | All numerical values |                      |
| Number of GI endoscopies for patient <16 yo                                             | All numerical values                                                            |                      | All numerical values |                      |



|                                                              |                      |                      |
|--------------------------------------------------------------|----------------------|----------------------|
| Other non-GI procedures performed within the endoscopy unit: | All numerical values | All numerical values |
| Bronchoscopy                                                 | All numerical values | All numerical values |
| Colposcopy                                                   | All numerical values | All numerical values |
| Cystoscopy                                                   | All numerical values | All numerical values |
| Hysteroscopy                                                 | All numerical values | All numerical values |

**Part 4: Workforce delivering the endoscopy service at your site**

Number of Endoscopists by Grade

| Grade                                                                                                    | Total number                                                           | Planned sessions per week in endoscopy   |
|----------------------------------------------------------------------------------------------------------|------------------------------------------------------------------------|------------------------------------------|
| Consultant Gastroenterologists                                                                           | Number employed at this grade                                          | Number of sessions per week in endoscopy |
| Consultant Colorectal Surgeons                                                                           |                                                                        |                                          |
| Consultant Upper GI or HPB Surgeon                                                                       |                                                                        |                                          |
| Other Consultants (e.g. radiologist)                                                                     |                                                                        |                                          |
| Nurse endoscopists                                                                                       |                                                                        |                                          |
| Other non-medical endoscopists                                                                           |                                                                        |                                          |
| Primary care endoscopists                                                                                |                                                                        |                                          |
| Non-consultant grade medical endoscopists                                                                |                                                                        |                                          |
|                                                                                                          | <i>Service lists (per week)</i>                                        | <i>Training lists (per week)</i>         |
| Gastroenterology SpR trainees                                                                            |                                                                        |                                          |
| Surgical SpR trainees                                                                                    |                                                                        |                                          |
| Other medical trainees (eg. radiology)                                                                   |                                                                        |                                          |
| Non-medical trainees inc. trainee nurse endoscopists                                                     |                                                                        |                                          |
| On a scale of 1-10, please indicate how easy or difficult you find it to recruit additional endoscopists | 1-10 scale (where 1 – no problem and 10 – very difficult) + n/a option |                                          |

|                                                                                 |          |
|---------------------------------------------------------------------------------|----------|
| Is your nursing establishment shared with a daycase facility?                   | Yes / No |
| Do you have decontamination staff as part of the endoscopy unit establishment?  | Yes / No |
| Do you have a team of dedicated bank nurses who support endoscopy when required | Yes / No |

Please provide Whole Time Equivalent (WTE) figures for the dedicated endoscopy establishment

| Band  | Total WTE currently employed            | WTE vacancies |
|-------|-----------------------------------------|---------------|
| 8 a-d | Numbers allowing decimals – maximum 100 |               |
| 7     |                                         |               |
| 6     |                                         |               |
| 5     |                                         |               |
| 4     |                                         |               |
| 3     |                                         |               |
| 2     |                                         |               |

|                                                                                                                                                        |                                                                        |
|--------------------------------------------------------------------------------------------------------------------------------------------------------|------------------------------------------------------------------------|
| On a scale of 1-10, please indicate how easy or difficult you find it to recruit endoscopy nursing support (registered nurses and HCAs or equivalent): | 1-10 scale (where 1 – no problem and 10 – very difficult) + n/a option |
|--------------------------------------------------------------------------------------------------------------------------------------------------------|------------------------------------------------------------------------|

| Number of Admin and Clerical Endoscopy Staff by Band                   |                                         |               |
|------------------------------------------------------------------------|-----------------------------------------|---------------|
| Band                                                                   | Total WTE currently employed            | WTE vacancies |
| 6+7+8a-d                                                               | Numbers allowing decimals – maximum 100 |               |
| 5                                                                      |                                         |               |
| 4                                                                      |                                         |               |
| 3                                                                      |                                         |               |
| 2                                                                      |                                         |               |
| Is your endoscopy admissions team part of the endoscopy establishment? | Yes/No                                  |               |

On a scale of 1-10, please indicate how easy or difficult you find it to recruit admin and clerical staff:

1-10 scale (where 1 – no problem and 10 – very difficult) + n/a option
